# Supplementary material
Source: PubMed Central journal article supplement (PMC1785081)
Supplement: blood_blood-2006-05-020289_1.pdf [file blood_blood-2006-05-020289_1.pdf]

| Patient Sample | Chromosomal Abnormality | % Clonal Cells in Marrow# | Age | Gender | Disease Status | Hct | Plt | WBC   | Mono | % Marrow Cellularity | IPSS | % Blasts | % Purity of CD14 Cells <sup>§</sup> | MMP9 Gene Expression |          |          | Prior Treatment *                 |
|----------------|-------------------------|---------------------------|-----|--------|----------------|-----|-----|-------|------|----------------------|------|----------|-------------------------------------|----------------------|----------|----------|-----------------------------------|
|                |                         |                           |     |        |                |     |     |       |      |                      |      |          |                                     | Time 0               | Day 5 in | Day 5 in |                                   |
| 1              |                         |                           | 73  | f      | RA             | 37  | 27  | 3.37  | 0.44 | 98                   | N/A  | 4.0      | 93                                  | 0.07                 | 2.02     | 2.13     | Epo                               |
| 2              |                         |                           | 52  | m      | RA             | 38  | 51  | 2.19  | 0.11 | 98                   | 1.5  | 5.0      | 74                                  | 0.00                 | 4.45     | 4.32     | no treatment                      |
| 3              | del 20q                 | 55                        | 77  | m      | RA             | 39  | 44  | 4.73  | 0.66 | 70                   | 0.5  | 2.0      | 87                                  | 0.15                 | 1.37     | 5.18     | Amifostine, Trisenox/Neumega      |
| 4              | t(2:11), del 5p+Xq      | 100                       | 43  | f      | RA             | 36  | 321 | 2.82  | 0.28 | 90                   | 1    | 2.0      | 88                                  | 0.07                 | 2.98     | 6.84     | Epo/G-CSF                         |
| 5              | del 20q                 | 75                        | 57  | m      | RA             | 34  | 41  | 2.77  | 0.22 | 100                  | 1    | 3.0      | 87                                  | 0.08                 | 3.93     | 7.23     | no treatment                      |
| 6              | inv 16                  | 45                        | 52  | m      | RA             | 35  | 15  | 1.59  | 0.08 | 98                   | N/A  | 4.0      | 77                                  | 0.00                 | 8.54     | 9.25     | no treatment                      |
| 7              | t(1:7), del 7p          | 65                        | 49  | m      | RA             | 39  | 132 | 2.45  | 0.12 | 90                   | 1.5  | 1.0      | 84                                  | 0.37                 | 3.84     | 11.66    | no treatment                      |
| 8              | t(1:7), del 7           | 17                        | 50  | f      | RA             | 35  | 171 | 5.26  | 0.53 | 20                   | 1    | 0.9      | 82                                  | 0.07                 | 5.80     | 14.10    | no treatment                      |
| 9              |                         |                           | 66  | m      | RA             | 27  | 101 | 6.62  | 0.79 | 70                   | 1    | N/A      | 94                                  | 0.15                 | 3.25     | 14.27    | Darbo                             |
| 10             | tri 15                  | 18                        | 45  | f      | RA             | 36  | 76  | 7.37  | 0.74 | 40                   | 1    | 0.0      | 77                                  | 0.10                 | 4.91     | 15.61    | no treatment                      |
| 11             |                         |                           | 52  | m      | RA             | 26  | 193 | 1.73  | 0.05 | 80                   | 2    | 4.5      | 81                                  | 2.77                 | 8.45     | 17.51    | no treatment                      |
| 12             | del 12                  | 85                        | 65  | m      | RAEB           | 34  | 27  | 5.07  | 0.71 | 95                   | 1.5  | N/A      | 86                                  | 0.05                 | 6.40     | 3.15     | no treatment                      |
| 13             | tri 8                   | 95                        | 24  | m      | RAEB           | 29  | 714 | 2.23  | 0.07 | 98                   | N/A  | 8.5      | 63                                  | 0.00                 | 4.19     | 7.02     | no treatment                      |
| 14             |                         |                           | 45  | f      | RAEB           | 24  | 122 | 2.40  | N/A  | 100                  | 1    | 7.0      | 90                                  | 0.40                 | 6.75     | 9.31     | Darbo                             |
| 15             |                         |                           | 47  | m      | RAEB           | 39  | 85  | 3.19  | 0.10 | 60                   | 1.5  | 10.0     | 68                                  | 0.38                 | N/A      | 9.67     | no treatment                      |
| 16             | del Y                   | N/A                       | 61  | m      | RAEB           | 26  | 38  | 1.02  | 0.04 | 30                   | 2    | 13.0     | 71                                  | 0.88                 | 15.61    | 10.88    | no treatment                      |
| 17             | del20q, t(13:14)        | 85%                       | 38  | m      | RAEB           | 31  | 29  | 1.17  | 0.09 | 60                   | 1.5  | 10.0     | 82                                  | 0.11                 | 2.63     | 11.41    | no treatment                      |
| 18             |                         |                           | 61  | f      | RAEB           | 31  | 49  | 5.34  | 0.43 | 70                   | 2.5  | 3.0      | 84                                  | 0.38                 | 22.49    | 14.01    | Topotecan/AraC                    |
| 19             |                         |                           | 49  | f      | RAEB           | 30  | 28  | 4.60  | 0.18 | 40                   | 1    | 10.0     | 83                                  | 1.60                 | 8.92     | 14.54    | Thalidomide/Darbo                 |
| 20             |                         |                           | 57  | f      | RAEB           | 29  | 79  | 1.15  | 0.02 | 20                   | 1    | 6.0      | 73                                  | 0.35                 | 8.40     | 19.30    | no treatment                      |
| 21             | t(11:19)                | N/A                       | 48  | f      | RAEB           | 28  | 29  | 2.70  | 0.02 | 30                   | 2    | 18.0     | 74                                  | 0.27                 | 1.13     | 25.03    | Prednisone, Epo                   |
| 22             |                         |                           | 50  | m      | RARS           | 29  | 111 | 1.42  | 0.28 | 65                   | 0.5  | 3.0      | 89                                  | 0.01                 | 13.45    | 4.00     | G-CSF                             |
| 23             |                         |                           | 58  | m      | CMML           | 39  | 106 | 4.68  | 2.34 | 80                   | N/A  | 0.6      | 93                                  | 0.06                 | 2.45     | 12.00    | no treatment                      |
| 24             |                         |                           | 67  | m      | unclassified   | 26  | 101 | 7.34  | 0.88 | 70                   | N/A  | 5.0      | 82                                  | 0.00                 | 6.46     | 6.02     | Darbo                             |
| 25             | del 20q                 | 100                       | 56  | f      | unclassified   | 44  | 222 | 17.57 | 0.70 | 65                   | 1.5  | N/A      | 84                                  | 0.21                 | 3.51     | 6.45     | no treatment                      |
| 26             |                         |                           | 58  | m      | unclassified   | 39  | 213 | 6.57  | 0.20 | 90                   | 0.5  | N/A      | 91                                  | 0.11                 | 3.19     | 6.88     | Epo/Thalidomine, 5-AzaC           |
| 27             |                         |                           | 29  | m      | unclassified   | 24  | 239 | 3.27  | 0.23 | 65                   | 1.5  | 2.4      | 82                                  | 0.02                 | 4.04     | 21.35    | Prednisone, lenalidomide, CSA/ATG |

# Percentage of clonal cells in marrow was determined by karyotype analysis in cultured marrow cells. The analysis was conducted by the FHCRC cytogenetics laboratories.

§ Percentage of purity of CD14 cells was determined by Flow cytometry.

\* All blood samples were obtained prior to the transplant conditioning regimen.

Abbreviations: 5-AzaC, 5-azacytidine; AraC, cytarabine; ATG, anti-thymocyte globulin; Darbo, darbopoeitin; CSA, cyclosporine-A; Epo, erythropoietin; G-CSF, granulocyte colony-stimulating factor; N/A stands for data not available.
